# Supplementary material
Source: publisher figshare collection journal article supplement (https://karger.figshare.com/ndownloader/files/22364853)
Supplement: Supplementary file 1 [file 22364853]

**Supplementary table 1.** Primers of four SNPs.

| SNP | Primer type | Primer sequence |
| --- | --- | --- |
| rs9277555 | ASP1 | GTCTGCAGAGAGGCTGGACTA |
|  | ASP2 | GTCTGCAGAGAGGCTGGACTG |
|  | LSP | GGTTGTCCTTGTGTGTGGCT |
|  | STA | CAGACTTGGGCGTCACTGG |
| rs11675434 | ASP1 | GCGTGAACTTATGCATGGAGC |
|  | ASP2 | GCGTGAACTTATGCATGGAGT |
|  | LSP | TTGGCATGATCTGTGCTCGG |
|  | STA | ACCAGCCTGCACCAATTCAG |
| rs301799 | ASP1 | CATGTATCACTAAATCCTTGAAC |
|  | ASP2 | CATGTATCACTAAATCCTTGAAT |
|  | LSP | ACAGCTCTGAGGCTTCCCAA |
|  | STA | TGAGGCAGAGGCTACTGCTA |
| rs3094228 | ASP1 | CATTTTTATTTGCCCCAGAGAAAGA |
|  | ASP2 | CATTTTTATTTGCCCCAGAGAAAGG |
|  | LSP | GGCAGACACCCTTGTTTCTAGG |
|  | STA | TGAGGAGTGCAAAGTGCCTG |

**Supplementary table 2.** Description of four SNPs.

| variant | Chr: location | gene | Major/minor allele | Effect allele frequency |
| --- | --- | --- | --- | --- |
| rs9277555 | 6:33087828 | HLA-DPB1 | A/G | 0.49 |
| rs11675434 | 2:1404043 | TPO | C/T | 0.31 |
| rs301799 | 1:8429242 | RERE | C/T | 0.17 |
| rs3094228 | 6:31462150 | HCP5 | A/G | 0.15 |
